# Supplementary material for: Epigenetic aspects of floral homeotic genes in relation to sexual dimorphism in the dioecious plant Mercurialis annua
Source: PubMed Central journal article supplement — J Exp Bot. 2019 Sep 7;70(21):6245–59. doi: 10.1093/jxb/erz379 (PMC6859717; doi:10.1093/jxb/erz379), 2019-09-07
Supplement: erz379_suppl_supplementary_figures_s1-s3_table_s1.pdf [file erz379_suppl_supplementary_figures_s1-s3_table_s1.pdf]

## Epigenetics aspects of floral homeotic genes in relation to sexual dimorphism in the dioecious plant *Mercurialis annua*

Janardan Khadka<sup>1</sup>, Narendra Singh Yadav<sup>1†</sup>, Micha Guy<sup>1</sup>, Gideon Grafi<sup>1\*</sup> and Avi Golan-Goldhirsh<sup>1\*</sup>

<sup>1</sup>French Associates Institute for Agriculture and Biotechnology of Drylands, Jacob Blaustein Institutes for Desert Research, Ben-Gurion University of the Negev, Midreshet Ben Gurion 84990, Israel. <sup>†</sup>Present address: Department of Biological Sciences, University of Lethbridge, AB T1K 3M4, Canada.

\*To whom correspondence should be addressed

### Supplementary Figures

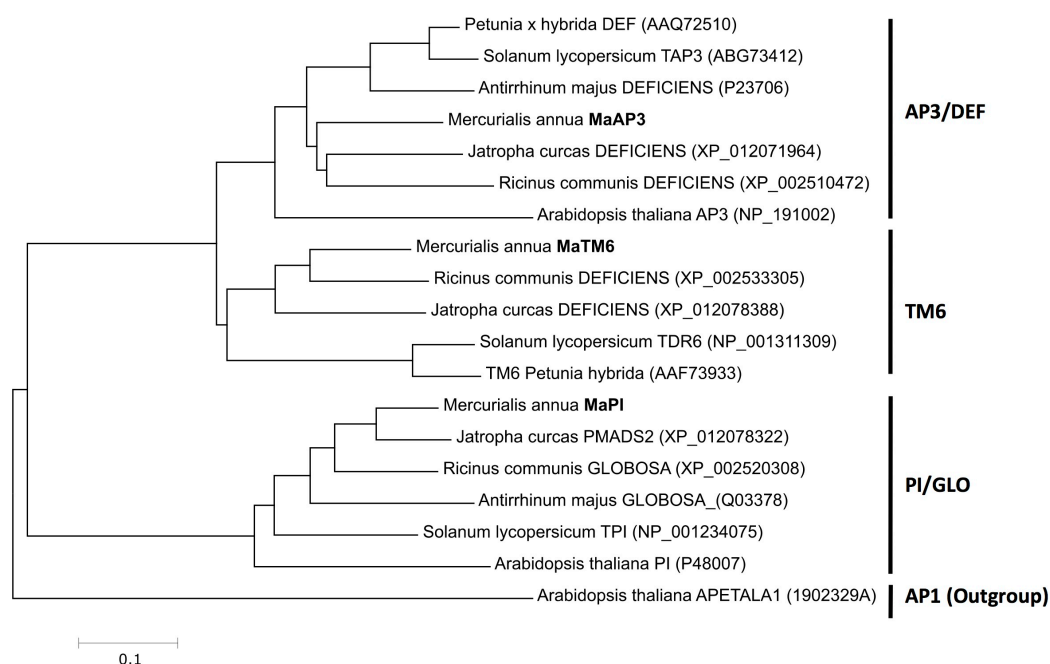

**Fig. S1.** Phylogenetic analysis of class B genes from *M. annua*, *A. thaliana* and various taxonomic groups. The complete translated sequences of *MaPI* (211 amino acids), *MaAP3* (224 amino acids), and *MaTM6* (225 amino acids) were used. The *API* gene of *A. thaliana* was used as an outgroup. The phylogenetic tree was constructed by neighbor joining (NJ) method with 500 bootstrap replications using MEGA6.0 package. The results confirm the placement of *MaPI* in the PI/GLO clade; *MaAP3* in the euAP3/DEF clade and *MaTM6* gene in the TM6 clade.

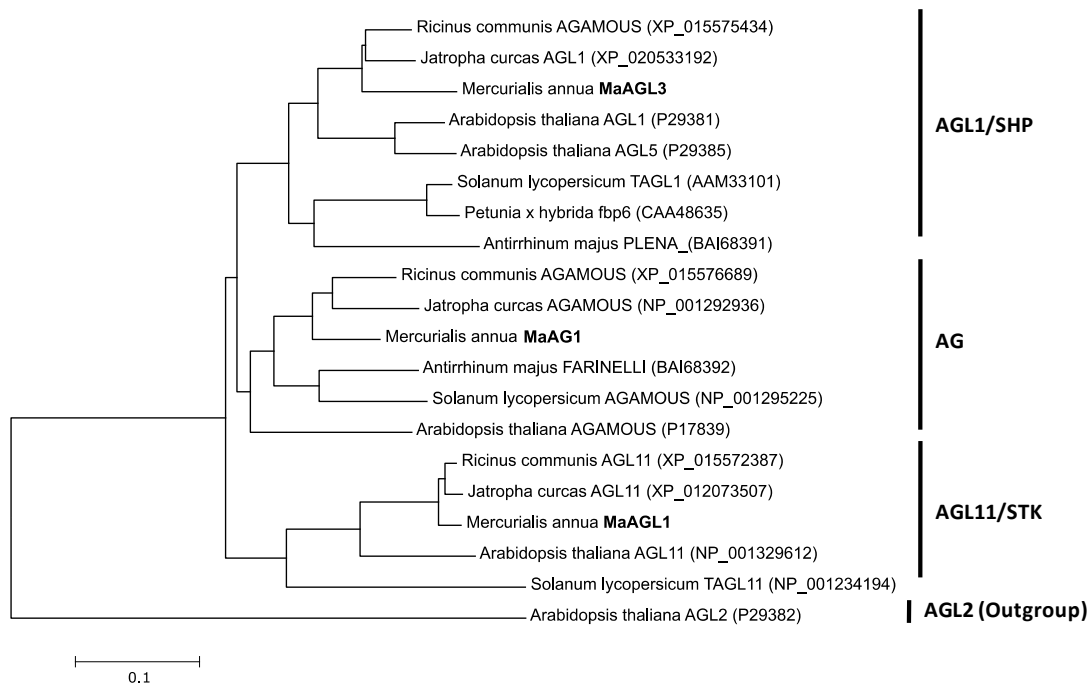

**Fig. S2.** Phylogenetic analysis of *AG*-like genes from *M. annua*, *A. thaliana* and various taxonomic groups. The complete translated sequences of *MaAG1* (241 amino acids), *MaAGL1* (222 amino acids) and *MaAGL3* (255 amino acids) were used. The *Arabidopsis* *AGL2* was used as an outgroup. The phylogenetic tree was constructed by a neighbor-joining method with 500 bootstrap replications using MEGA6.0 package. The dendrogram placed the *MaAGL1* in the STK clade (class D), *MaAG1* in the AG clade (class C) and *MaAGL3* gene in the SHP clade (class D).

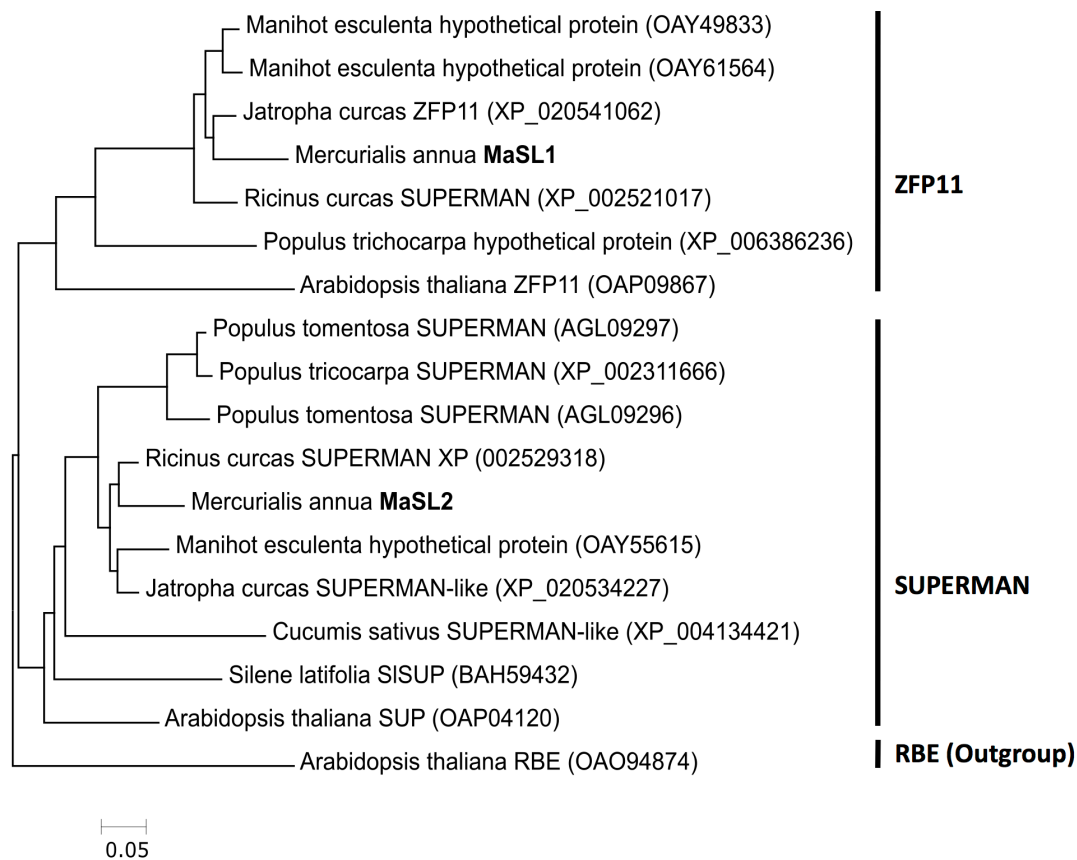

**S3.** Phylogenetic analysis of *SUPERMAN-LIKE* genes from *M. annua*, *A. thaliana* and other various taxonomic groups. The conserved region between translated sequences of *MaSL1* (168 amino acids) and *MaSL2* (182 amino acids) were used because N-terminal regions of these sequences showed very low similarity, while C2H2 domain and EAR-motif of *MaSL1* and *MaSL2* were highly conserved. The *AtRBE* gene, a C2H2 zinc-finger protein that acts as spatial sepal-petal boundaries regulator was used as an outgroup. The phylogenetic tree was constructed by neighbor joining (NJ) method with 500 bootstrap replications in the MEGA6.0 package. It was found that *MaSL1* is an ortholog of *AtZFP11*, while *MaSL2* is an ortholog of *AtSUP*.

## Supplementary table

**Table S1:** List of primers used in this study

| Gene          | Primer    | Sequence (5'--> 3')                                       | Used for                      |
|---------------|-----------|-----------------------------------------------------------|-------------------------------|
| Agamous-like  | MADSF     | AARATHSARATHAARMGNATHGARAA                                | Gene<br>sequence<br>isolation |
|               | MADSR     | ARNSMRACHKBDGCRTCRCANARNAC                                |                               |
|               | AGLF      | GTNCANTTYTGYAARMGNMGNAAYGG                                |                               |
|               | AGLR      | GCYAAYAARTAYCTNTCDATNGA                                   |                               |
| Pistillata    | PILF      | ATGGGNMGNNGNAARATHGARATHAA                                |                               |
|               | PIRc      | ARRTTTGGYTGDATNGGYTGNAC                                   |                               |
|               | PIF2      | ATHGAYMGNGTNAARAARGARAAYGA                                |                               |
|               | PIR2      | TCTTCTCCNTTCARRTGCCKNAG                                   |                               |
| Apetala3      | AP3F2     | GATGCWAAGGTTTNSATHATHATG                                  |                               |
|               | EAP5F     | CCAAGGTTTCCATTATCATGTTYTC                                 |                               |
|               | EAP3R     | CTCAAGCAAAGGGTARGTKGTRAG                                  |                               |
| TM6           | PAP5F     | AACTCACWGTCTCTYTGTGATGC                                   |                               |
|               | PAP3R     | TCATGCAAGGCGRAGYTYATGGG                                   |                               |
|               | PAP5R     | CATAATCYCCTTCATTSWCCACTA                                  |                               |
|               | AP3 TM6 F | GGTCGTGGAAAGATTGAGAT                                      |                               |
|               | AP3 TM6 R | TAGAGGTTAGAAGCCCCATTTG                                    |                               |
| Superman-like | SM_F1     | AGACAATTCAACTCTGCTCAAG                                    |                               |
|               | SM_F2     | GCTCTTGGTGGTCACATGAA                                      |                               |
|               | SM_R      | CCAAGTCGTAGCTCCAAATCCAA                                   |                               |
|               | SM_S      | GGAGACGATTATCTTGGTGGGTTTTTC                               |                               |
|               | SM_A      | CTAAGAGTAWCCARTCGAAGTTCC                                  |                               |
| Actin         | ACTF      | TGGTTCCACTATGTTCCCTG                                      |                               |
|               | ACTR      | GATCCTCCAATCCAGACACT                                      |                               |
|               | MaAct F   | ATCTCACTGATGCTTTGATGA                                     |                               |
|               | MaACT_R   | ACTTTCTTTTCAGGTGGTGCGA                                    |                               |
| MaAGL1        | 3RF1      | GATAGAGAACACCACAAATCGTCAG                                 | 3' RACE                       |
|               | 3RF2      | TGCAAGCGGAGAAGTGGC                                        |                               |
|               | RACE1     | CCAGTGAGCAGAGTGACGAGGACTCGAG<br>CTCAAGC (T) <sub>17</sub> |                               |
|               | RACE2     | CCAGTGAGCAGAGTGACG                                        |                               |
|               | RACE3     | GAGGACTCGAGCTCAAGC                                        |                               |
| MaAGL1        | AGL1_RT   | (P) TATCAGGCAGGAAC                                        | 5' RACE                       |
|               | AGL1_S2   | CGGATGGGGAGCAATGGAG                                       |                               |
|               | AGL1_A2   | ACACGCCTTCTTGTATCTATC                                     |                               |
|               | AGL1R5    | TACTCAATTTTCAGCCAGCAACAA                                  |                               |
| MaAG1         | AGL2_RT   | (P) TGAAGGGGCATCTG                                        |                               |
|               | AGL2_S2   | CCAATAATCACTACCCACATC                                     |                               |
|               | AG2R2     | GTATTTGATGTGTCCGAGGATGC                                   |                               |

|        |          |                           |                       |
|--------|----------|---------------------------|-----------------------|
| MaAGL3 | AGL23_A2 | TCAGCATCACAAAGAACAGAC     | 5' RACE               |
|        | AGL3_RT  | (P) AGGTTTACAGGGAAG       |                       |
|        | AG3R2    | TTTGTGGAATCAGAACAGGCTT    |                       |
| MaPI   | PI_RT    | (P) ACCCTTTGTTGATG        |                       |
|        | PI_A1    | TGTCACGAACACCAGCAAG       |                       |
|        | PI_S1    | GAAAAGATGTTGGAGGATG       |                       |
|        | PI_S2    | GGCAATGGAAGAGAATGTGAGA    |                       |
|        | PI_A2    | AGTGCTTCTTCTAAACCCATCAG   |                       |
| MaAP3  | AP3_RT   | (P) AGATGGTTAGGGTTC       |                       |
|        | AP3_A1   | TACGCAGATTCCTATTCACA      |                       |
|        | AP3_S2   | GGAGGGGATTATGAGTCTGTG     |                       |
|        | AP3_A2   | TCTGCTTAGTTGTGATGGAA      |                       |
| MaSL1  | SL_RT    | (P) CACAACCTCTTTAGG       |                       |
|        | SL_A1    | GAGAAGTAATGTGAGGTGGA      |                       |
|        | SL_S1    | GAGGTTTTGCAGAGTAATGAAG    |                       |
|        | SL_A2    | GGTTAGGGTTAGGGTTTGGATG    |                       |
|        | SL_S2    | GCTTGAGTTGAAATAGGGTT      |                       |
| MaAGL1 | AGL1W1   | GCGACTGGAGAAGACGATTAGG    | Promoter<br>isolation |
|        | AGL1W2   | ATTTGTGGTGTCTCTATCCT      |                       |
|        | AGL1W3   | CATCCCTGGGCGTTGTACT       |                       |
| MaAG1  | AG2W1    | CTAGAGAAGACGATGAGAGC      |                       |
|        | AG2W2    | TCCTCCCTCGAATCGCCTTG      |                       |
|        | AG2W3    | CTGATGAGTAGAAAGAAAGAGATGC |                       |
| MaAGL3 | AG3W1    | ACGAGTGGAGAAGATAATGAGAGA  |                       |
|        | AG3W2    | GCCTTCCGATTCTTGATTAG      |                       |
|        | AG3W3    | TGGTAAGAAAACAAACAAGG      |                       |
| MaAP3  | AP3W1    | GTGATGGAAGGGCTCATGTATT    |                       |
|        | AP3W2    | TAGCCTTCTTGAACAGACCAT     |                       |
|        | AP3W3    | AGTCACCTGTCGATTTGTAGA     |                       |
| MaPI   | PIW1     | GTAGAAGGGCTGCAATACTCAT    |                       |
|        | PIW2     | GCATCGCATAAACTGTAATCTCC   |                       |
|        | PIW3     | AGTGACTTGCCGTGTTGCTTG     |                       |
| MaSL1  | SL_A1    | GAGAAGTAATGTGAGGTGGA      |                       |
|        | SL_A2    | GGTTAGGGTTAGGGTTTGGATG    |                       |
| MaSL2  | SMWF1    | GTGAGCTTGATTTAGTGGCAAGA   |                       |
|        | SMWF2    | AGTAAGTAGTGACTAAAACATA    |                       |
|        | SMWR1    | GGTTAAGAATGGAGCACTGAC     |                       |
| MaPI   | MPF      | ACAAGAAATGGCAATGGAAGAG    | RT and qPCR           |
|        | MPR      | TGTAGTCCCTCACCCTTTGTTG    |                       |
| MaAP3  | MaAP3_F  | CAAGAGAAGAAGATCCGCAGTATG  |                       |
|        | MaAP3_R  | GTTAGGGTTCATCCGCAGAG      |                       |
|        |          |                           |                       |

|                 |           |                            |                        |               |
|-----------------|-----------|----------------------------|------------------------|---------------|
| MaAGL1          | AG1LF1    | CCAAGATAGCAGAAGTGGAAAGG    | Chop-PCR/<br>MNase-PCR |               |
|                 | AG1LR1    | CTCCCCATCCGTTTAGCCAAG      |                        |               |
|                 | AG1SLF    | TGCGGCAACAGATTCAGATG       |                        |               |
|                 | AG1SR     | TCAAGCTCAATCTCCTTTTTGG     |                        |               |
| MaAG1           | AG2F1     | CAAGATTGCTGAGAATGAAAGG     |                        |               |
|                 | AG2R1     | CTTGATGTGGGTAGTGATTAGTTGG  |                        |               |
| MaAGL3          | MaAG3F    | TGAAAATGAGAGAGCACAACAGC    |                        |               |
|                 | MaAG3R    | ACGGAACAGATTCGTACACAGAAC   |                        |               |
| MaActin         | ACTNF     | TGGTTCCACTATGTTCCCTG       |                        |               |
|                 | ACTNR     | GATCCTCCAATCCAGACACT       |                        |               |
| MaTM6           | AP3TM6_F  | GCAACAACGACGAAGAAGAT       |                        |               |
|                 | AP3TM6_R  | GCGGCGTGATGAATGGTAG        |                        |               |
| MaSL1           | SL_RT_F   | ATGTTTAGGAAGTGAAGGAGACAAG  |                        |               |
|                 | SL_A1     | GAGAAGTAATGTGAGGTGGA       |                        |               |
| MaSL2           | SM_RT_F   | AGCACTTGGGGGTCACAT         |                        |               |
|                 | SM_RT_R   | ATCTCAGCTTTCTTCAACAAC      |                        |               |
| MaAGL1-Promoter | AGL1CPF   | GTGAATTGCTTTTTGTATTTCTGG   |                        |               |
|                 | AGL1CPR   | ACCTGGGCGTTGTACTCC         |                        |               |
| MaAP3 promoter  | BS_AP3C_S | GAAGGATGAAGTGAATATTTGTTGG  |                        |               |
|                 | AP3W1     | GTGATGGAAGGGCTCATGTATT     |                        |               |
| MaPI Promoter   | PIPF1     | GAAAAAAGCAGTTGCCTTGCC      |                        |               |
|                 | PIW1      | GTAGAAGGGCTGCAATACTCAT     |                        |               |
| MaSL1 promoter  | SL1_S     | ACAACACTCATCACTCTAACTCTC   |                        |               |
|                 | SL1_A1    | CTTGAATTCTTGTCTCCTTCACTTCC |                        |               |
| MaSL2 promoter  | SMP_BSF1  | AAAACAAGGGGGTGAGCAAATA     |                        |               |
|                 | SMP_BSR2  | CCACCTACATAATCTTCTCCAC     |                        |               |
| MaActin         | MaACT_F   | ATCTCACTGATGCTTTGATGA      |                        |               |
|                 | MaACT_R   | ACTTTCCTTCAGGTGGTGCGA      |                        |               |
| MaAP3 genebody  | AP3GBF1   | ATTCAAAGGAGGAGGAGTT        |                        | Bisulfite-seq |
|                 | AP3GBR1   | CATTTAAACAATCGCCCATCC      |                        |               |
|                 | AP3GBF2   | ATTAGGGTTATGGCGAGAGG       |                        |               |
|                 | AP3GBR2   | CCTATTCACATCTTTC AATTTC    |                        |               |
| MaAP3 promoter  | BS_AP3C_S | GAAGGATGAAGTGAATATTTGTTGG  |                        |               |
|                 | BS_AP3_A1 | CTTGCTCTCGCCATAACCCTAATTT  |                        |               |
|                 | BS_AP3_A2 | TTTTGAAAACCTCCTCCTCTTT     |                        |               |
| MaSL1 genebody  | S1GBF1    | AATGGAGAGAATATGTTTAGGAAGTG |                        |               |
|                 | S1GBR1    | TCTAAACTCCAAATCCACAATTCT   |                        |               |
|                 | S1GBF2    | GAAGGAGATAAGAATTTAAGTGG    |                        |               |
|                 | S1GBR2    | TAAACCCTATTTCCA ACTCCAA    |                        |               |
| MaSL1 promoter  | SLCT_S1   | GTAAACGTTAAAAAATGATGGAAG   |                        |               |
|                 | SL1_A1    | CTTGAATTCTTGTCTCCTTCACTTCC |                        |               |
|                 | SL1_A2    | CATGTTCTCTCATT TTTTCTTTTA  |                        |               |
